# Supplementary material for: Metformin synergistically suppress tumor growth with doxorubicin and reverse drug resistance by inhibiting the expression and function of P-glycoprotein in MCF7/ADR cells and xenograft models
Source: PubMed Central journal article supplement (PMC5788630; doi:10.18632/oncotarget.23187), 2017-12-08
Supplement: oncotarget-09-2158-s001.pdf [file oncotarget-09-2158-s001.pdf]

# Metformin synergistically suppress tumor growth with doxorubicin and reverse drug resistance by inhibiting the expression and function of P-glycoprotein in MCF7/ADR cells and xenograft models

## SUPPLEMENTARY MATERIALS

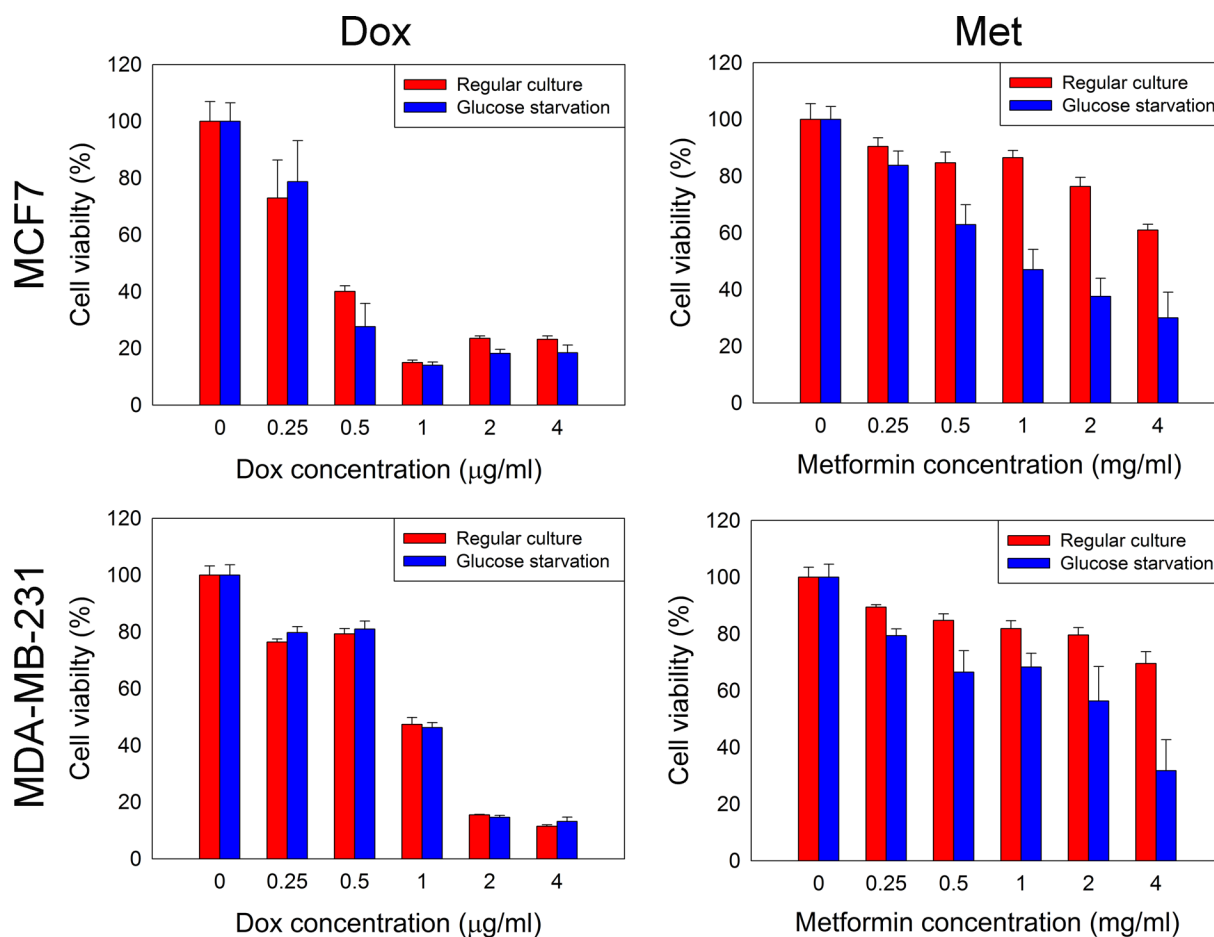

Supplementary Figure 1: Cytotoxicity of metformin and doxorubicin in MCF7 and MB-MD-231 cell line impacted by glucose starvation at 48 h. Cell viability without drug treatment as regarded as 100%, respectively (n = 5).

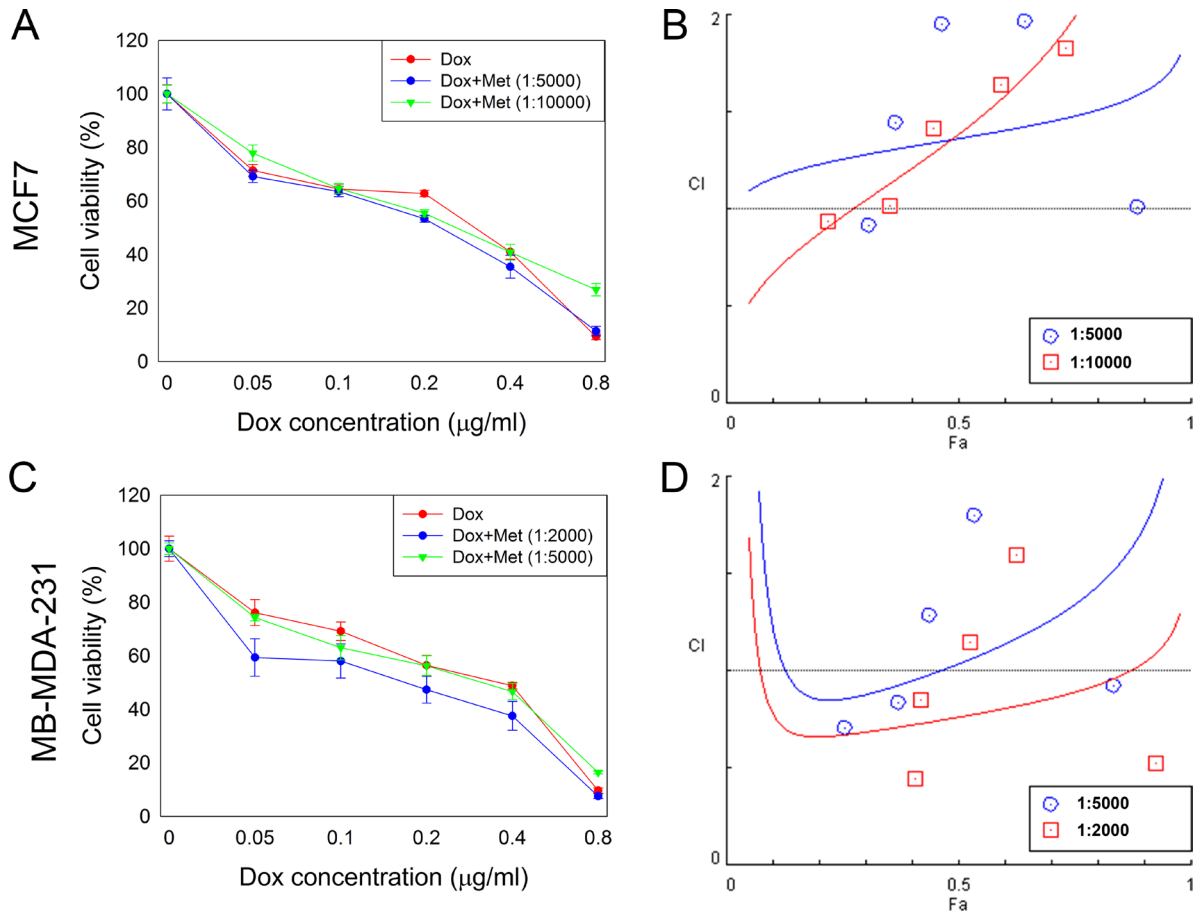

**Supplementary Figure 2: Combined effect of metformin with doxorubicin in MCF7 and MB-MDA-231.** (A, B) Effect of metformin and doxorubicin with defined combination ratios on cell proliferation in MCF7 (A), and the corresponding Fa-CI plot of CI (B) ( $n = 5$ ). (C, D) Effect of metformin and doxorubicin with defined combination ratios on cell proliferation in MB-MDA-231 (C) and the corresponding Fa-CI plot of CI (D) ( $n = 5$ ).

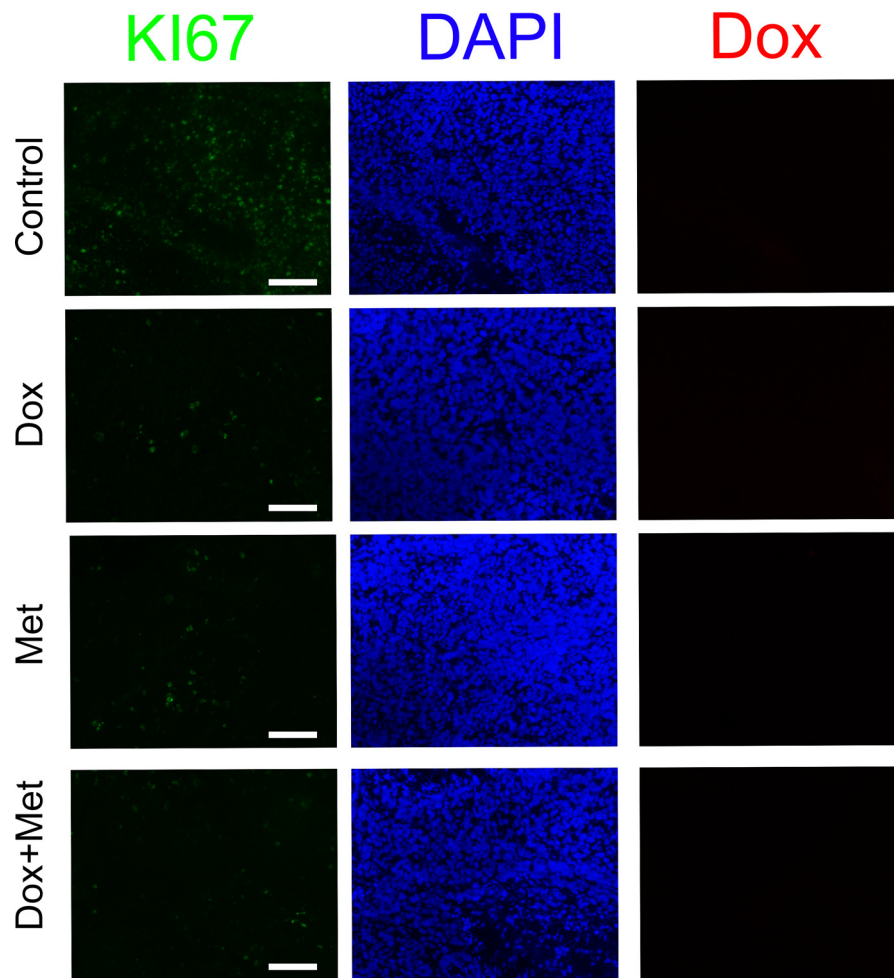

Supplementary Figure 3: Immunofluorescence staining of Ki67 in MCF7/ADR tumor tissues using Alexa Fluor<sup>®</sup>488 labeled secondary antibodies. Bar = 100  $\mu$ m.

**Supplementary Table 1: Primers for qRT-PCR**

| <b>Gene</b> | <b>Forward primer</b>   | <b>Reverse primer</b>     | <b>Product size</b> |
|-------------|-------------------------|---------------------------|---------------------|
| ABCB1       | TTGCTGCTTACATTCAGGTTTCA | AGCCTATCTCCTGTCGCATTA     | 105                 |
| ABCC1       | CTCTATCTCTCCCGACATGACC  | AGCAGACGATCCACAGCAAAA     | 94                  |
| ABCC2       | TCTCTCGATACTCTGTGGCAC   | CTGGAATCCGTAGGAGATGAAGA   | 115                 |
| ABCG2       | ACGAACGGATTAACAGGGTCA   | CTCCAGACACACCACGGAT       | 93                  |
| Twist1      | GGAGTCCGCAGTCTTACGAG    | TCTGGAGGACCTGGTAGAGG      | 200                 |
| Snail       | TGCGCTACTGCTGCGCGAAT    | GGGCTGCTGGAAGGTAAACTCTGGA | 147                 |
| MMP1        | GGGGCTTTGATGTACCCTAGC   | TGTCACACGCTTTTGGGGTTT     | 142                 |
| MMP9        | CGTCTTCCAGTACCGAGAGA    | GCAGGATGTCATAGGTCACG      | 119                 |
| GAPDH       | GGAGCGAGATCCCTCCAAAAT   | GGCTGTTGTCATACTTCTCATGG   | 197                 |

Abbreviations: ABCB1, ATP Binding Cassette Subfamily B Member 1; ABCC1, ATP Binding Cassette Subfamily C Member 1; ABCC2, ATP Binding Cassette Subfamily C Member 2; ABCG2, ATP Binding Cassette Subfamily G Member 2; MMP1, Matrix Metallo peptidase 1; MMP9, Matrix Metallo peptidase 9; GAPDH, Glyceraldehyde-3-Phosphate Dehydrogenase.
